# Supplementary material for: Application of Host-Depleted Nanopore Metagenomic Sequencing in the Clinical Detection of Pathogens in Pigs and Cats
Source: MDPI journal article supplement (doi:10.3390/ani13243838), 2023-12-13
Supplement: s1 [file s1]

**Table S1.** PCR Primer Information.

| Pathogen                         | Primer Sequences                                        | Annealing Temperature (°C) | Amplification Product Size (bp) |
|----------------------------------|---------------------------------------------------------|----------------------------|---------------------------------|
| FPV                              | F: GTCATACGTACGCTCCTT<br>R: ACTCTTTACTAACCAAGTCCC       | 56                         | 1078                            |
| FHV-1                            | F: ACAGACACATATAGGATCAGC<br>R: TAACGTGTATCTGGATTCGTC    | 57                         | 539                             |
| FCV                              | F: CATGCAATCATACAACCCA<br>R: CACATGTTGATTGGCGGGTA       | 57                         | 757                             |
| FCoV                             | F: GCTGCACCGTTTATGAGAAG<br>R: ACCAGCTGAAGTTCCAGT        | 57                         | 726                             |
| FIV                              | F: ATTATGGTGGGGATTGAA<br>R: ATCTATATAACCATGTTTCTGCT     | 55                         | 712                             |
| FeLV                             | F: CCATGCACACAGACATCCAG<br>R: TATCTGTTGGTACTGTTGGGT     | 59                         | 443                             |
| <i>Mycoplasma felis</i>          | F: GTCGGTTTTGTTAACTACGG<br>R: GAGTTTCACCTTCTGTGCTT      | 55                         | 771                             |
| <i>Chlamydia felis</i>           | F: TTGTGCTACTTGGTGTGATGCTA<br>R: CAGCGTCGATTAAAGTTGCTC  | 59                         | 953                             |
| <i>Bordetella bronchiseptica</i> | F: CCGCACATTTCCGAACCTTCACT<br>R: CCGACAGCACGTCAAAGCC    | 64                         | 763                             |
| CSFV                             | F: GTGGAGTGGGAGGAATT<br>R: CTCTCACCCTGGAATC             | 52                         | 989                             |
| PRRSV                            | F: CCAGTCAATCARCTGTGCC<br>R: ATTGAATAGGTGACTYAGAGG      | 56                         | 420                             |
| PCV2                             | F: GGCCAGTTCGTCACCCTT<br>R: GTAAACTACTCCTCCCGCCAT       | 56                         | 376                             |
| PRV                              | F: ACGCACGAGGACTACTACGAC<br>R: GTCCATTCGTCACTTCCGGTT    | 66                         | 241                             |
| ASFV                             | F: GATGCCGATACCACAAGATCAG<br>R: GAGAACGTGAACCTTGCTATTCC | 58                         | 869                             |
| PEDV                             | F: TGCCATTCAGCGTATTCTT<br>R: GTAGCCAATACTGCCAGAT        | 52                         | 925                             |
| TGEV                             | F: GATGGCGACCAGATAGAAG<br>R: TGCAATAGGGTTGCTTGAC        | 56                         | 613                             |
| PDCoV                            | F: ACGGTTGGCTGCACTTAATG<br>R: ACTGAGGAGGTGTTGCTGT       | 56                         | 509                             |
| PoRV                             | F: TATGCTATACCAGTAGGACCA<br>R: GGTCACATCCTCTCACTAT      | 52                         | 277                             |
| 16S rRNA                         | F: AGAGTTTGATCCTGGCTCAG<br>R: TACGGTTACCTTGTTACGACTT    | 56                         | 1465                            |
| STa                              | F: TGAAAAAGCTAATGTTGGCAAT<br>R: GCAGGATTACAACAAAGTTCACA | 56                         | 199                             |

|       |                                                               |    |     |
|-------|---------------------------------------------------------------|----|-----|
| STb   | F: ATTTCTTCTTGCATCTATGTTTCGT<br>R: CATCCTTTTGCTGCAACCATT      | 56 | 195 |
| LT    | F: ACGGCGTTACTATCCTGTCTATGTGC<br>R: TTGGTCTCGGTCAGATATGTGATTC | 56 | 275 |
| Stx2e | F: ATCTTCGTAAATAGTATACGGACA<br>R: CAATTCAGTATAACGGCCACA       | 56 | 681 |
| CNF   | F: GTTATATAGTCGTCAAGATGGAA<br>R: TCACTAAGCTTTACAATATTGACA     | 56 | 636 |

RNA viruses were subjected to PCR using the QIAGEN OneStep RT-PCR Kit (QIAGEN), and DNA viruses and bacteria were subjected to PCR using the QIAGEN Multiplex PCR Kit (QIAGEN).

**Table S2.** Sequencing Information for 9 Samples.

| Sample No. | Flow Cell and Kit      | Host Removal | Host Reads (%) | N50                 | Generated Reads | Qscore ≥10 fastq.gz files |
|------------|------------------------|--------------|----------------|---------------------|-----------------|---------------------------|
| 1          | R9.4.1; SQK-LSK110     | Yes          | 45             | 665b                | 568.68k         | 373.5Mb                   |
| 2          | R10.4.1; SQK-NBD114.24 | Yes          | 51             | 701b                | 260.6k          | 240.5Mb                   |
| 3          | R10.4.1; SQK-NBD114.24 | Yes          | 18             | 548b                | 884.5k          | 670.8MB                   |
| 4          | R10.4.1; SQK-NBD114.24 | Yes          | 56             | 578b                | 165.4 k         | 138.1MB                   |
| 5          | R9.4.1; SQK-LSK110     | No           | 77             | 495b                | 417.39k         | 201.8MB                   |
|            |                        | Yes          | 67             | 593b                | 820.84k         | 589.4MB                   |
| 6          | R9.4.1; SQK-LSK110     | Yes          | 2              | 738b                | 1.33M           | 630.8MB                   |
| 7          | R9.4.1; SQK-LSK110     | Yes          | 65             | 560b                | 466.99k         | 125.6MB                   |
| 8          | R9.4.1; SQK-LSK110     | No           | 98             | 1.35kb <sup>1</sup> | 559.01k         | 599.0MB                   |
|            |                        | Yes          | 48             | 687b                | 819.6k          | 594.1MB                   |
| 9          | R9.4.1; SQK-LSK110     | No           | 82             | 518b                | 2.48M           | 1.5GB                     |
|            |                        | Yes          | 73             | 556b                | 2.29M           | 1.6GB                     |

1. Sample 8, which did not undergo host removal, had a sufficiently high DNA concentration after nucleic acid extraction, eliminating the need for DNA PCR amplification. As a result, the non-amplified DNA sequences were longer, leading to a higher N50 value after sequencing.
